# Supplementary material for: Cryogenic In-Situ Fabrication of Reconfigurable Direct-Write Logic Circuits and Devices
Source: Research Square preprint supplement (doi:10.21203/rs.3.rs-6038508/v1), 2025-03-04
Supplement: Supplementary file 1 [file f085634dea4169ecb7ecc29d.docx]

Supplementary Materials for

**Cryogenic In-Situ Fabrication of Reconfigurable Direct-Write Logic Circuits and Devices**

Yuhao Hong1,2#, Lei Wang1#, Ziyue Shen1, Tongrui Li1, Long Wei1, Shilin Hu1, Junhua Liu1, Wen Xiao1, Lin Li1, Mark Huijben2, Kai Chen1, Yulin Gan1, Guus Rijnders2, Gertjan Koster2*, Zhaoliang Liao1*

1National Synchrotron Radiation Laboratory, University of Science and Technology of China; Hefei, 230029, China

2MESA+ Institute for Nanotechnology, University of Twente; Enschede, 7500 AE, the Netherlands.

*To whom correspondence should be addressed: [g.koster@utwente.nl](mailto:g.koster@utwente.nl), [zliao@ustc.edu.cn](mailto:zliao@ustc.edu.cn)

**1.** **Characteristics of contact barrier**

**
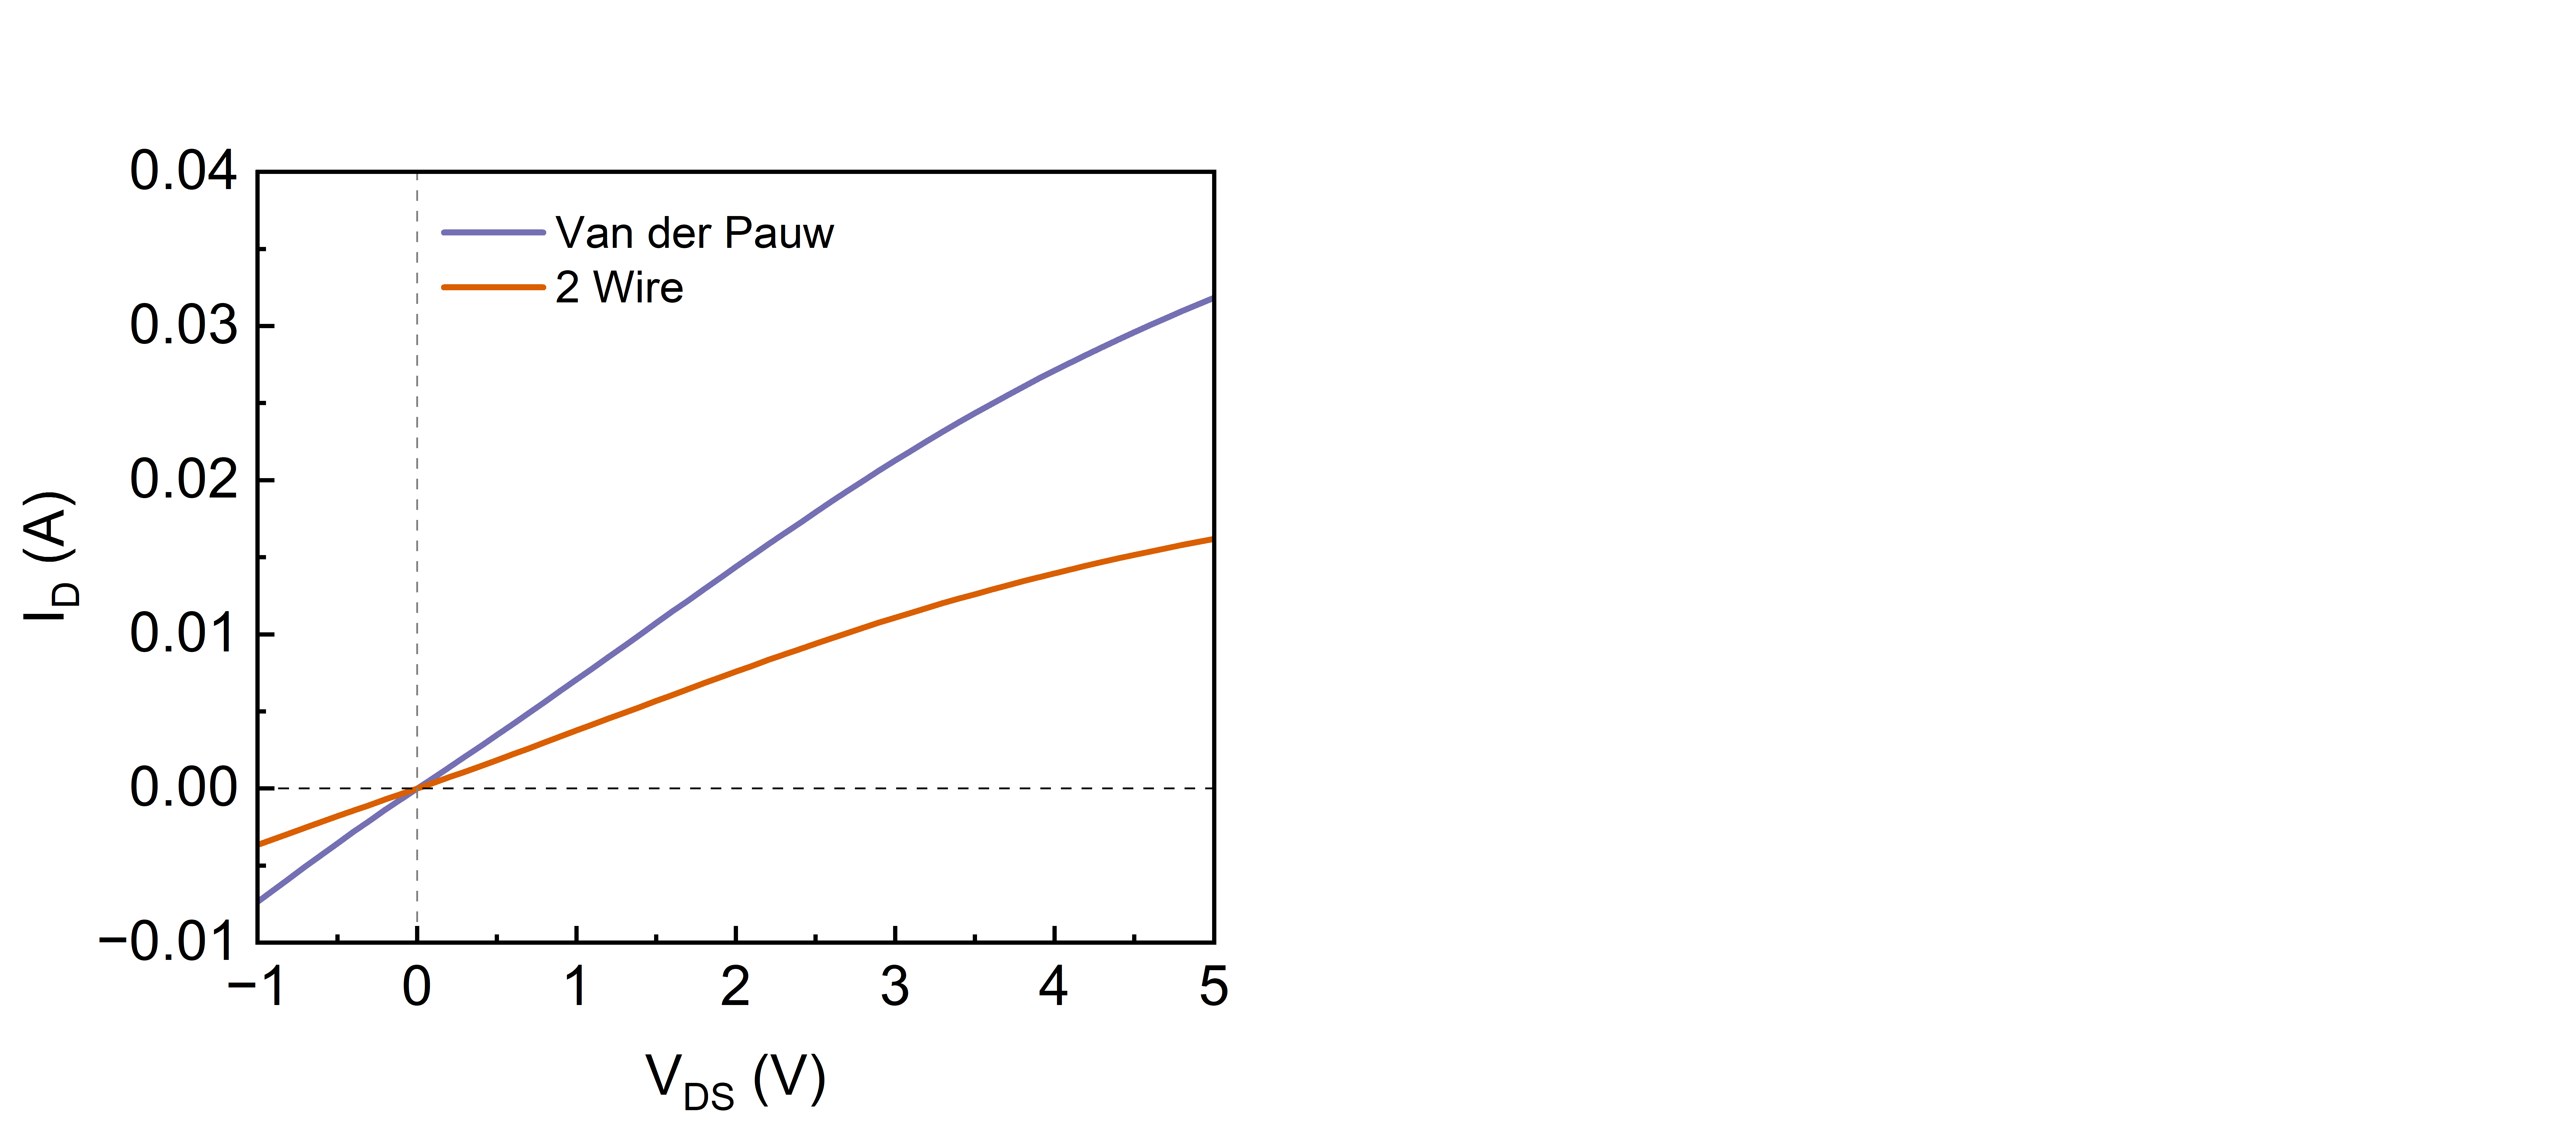
**

**Fig. S1 | ID-VDS characteristics of metal contact at 2 K.**

Both the 2-wire method (orange line) and the Van der Pauw method (purple line) demonstrate similar linear ID-VDS characteristics. This indicates the absence of a Schottky barrier between the C-2DEG and the metal electrode surface, confirming a metal-metal ohmic contact.

**2.** **Transport characteristics at different temperature**

**
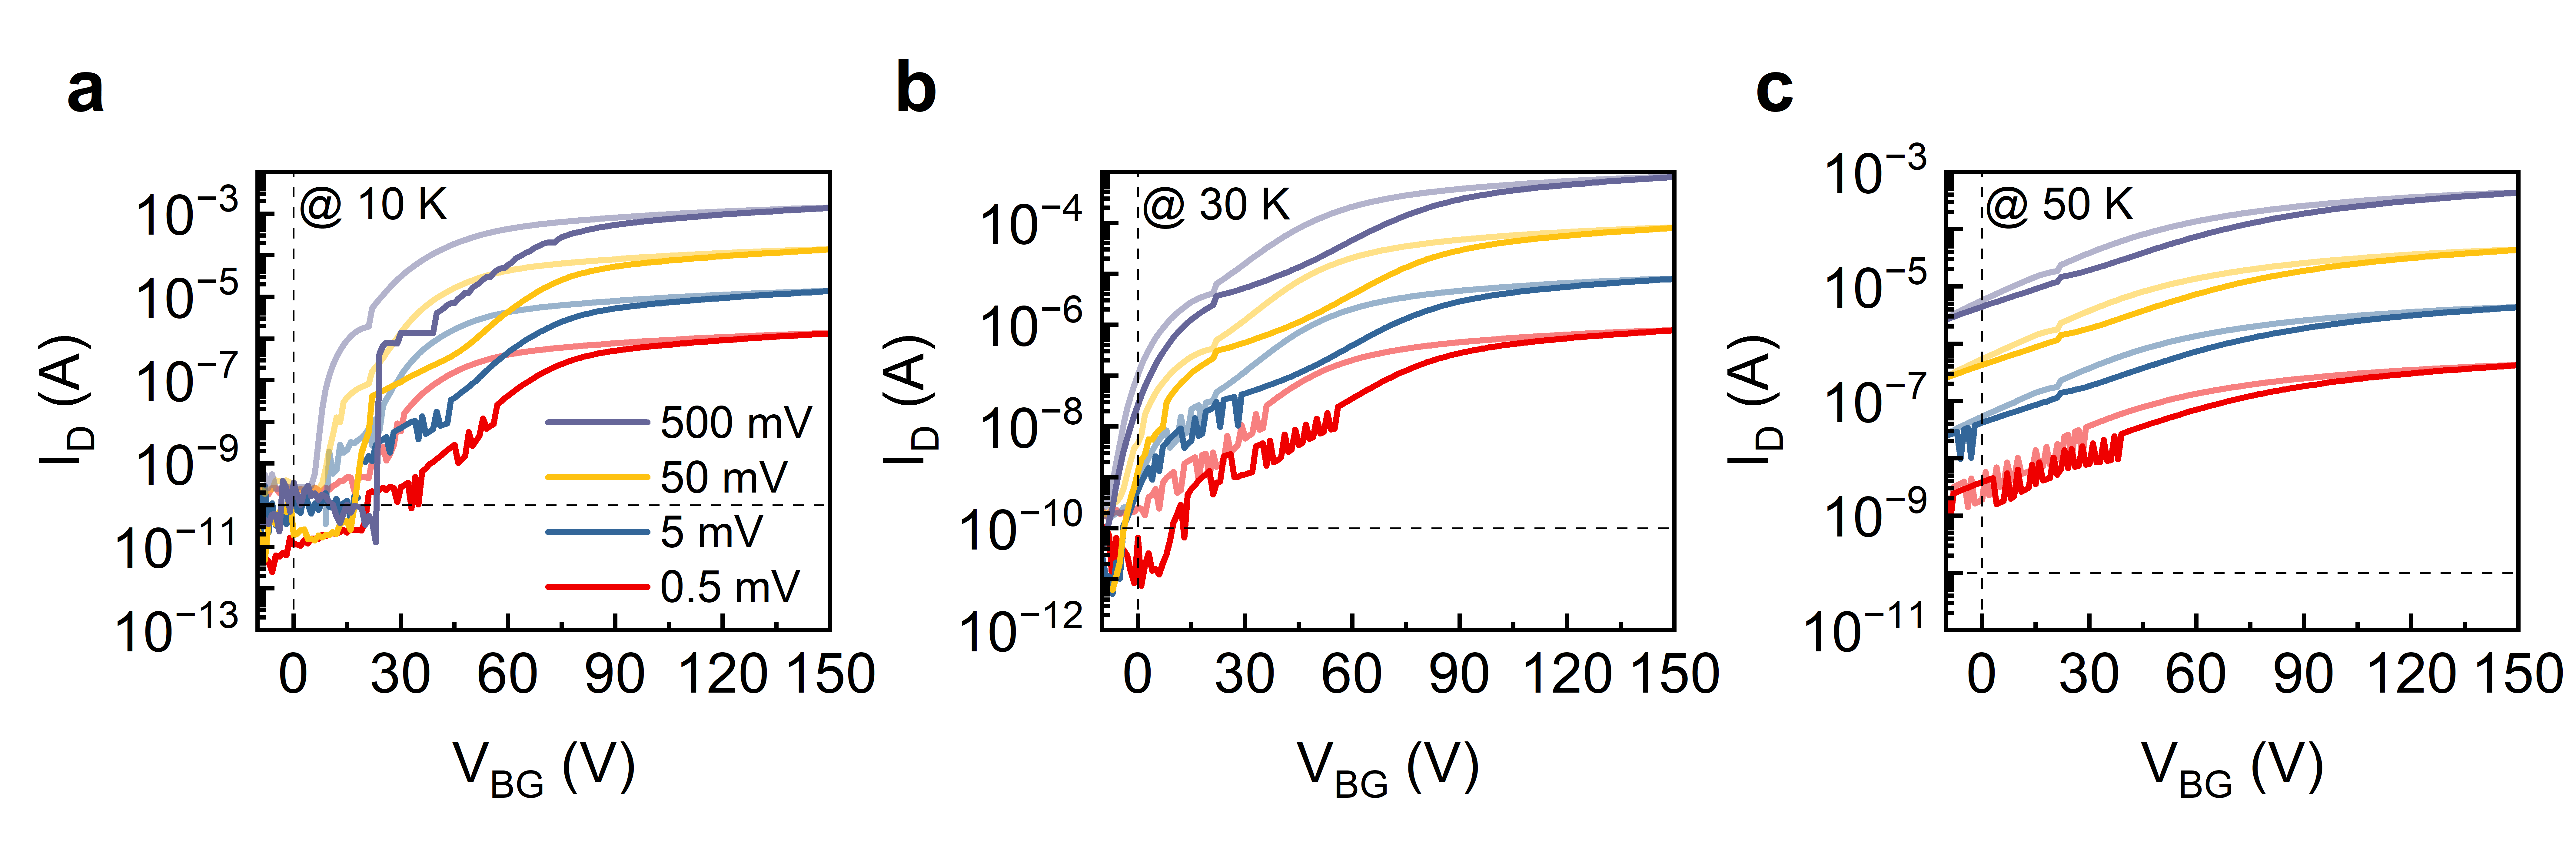
**

**Fig. S2 | VDS-dependent ID-VBG characteristics at different temperature.** Transport characteristics (ID-VBG) of sample with a STO substrate thickness of 0.5 mm are shown under different VDS (from 0.5 mV to 5 mV) at 10 K (**a**), 30 K (**b**) and 50 K (**c**).

The saturation ID increases with VDS at all temperatures, aligning with the trend observed at 2 K (see Fig. 3b in main text). Meanwhile, large Ion/Ioff ratio (over 104) at VDS = 0.5 mV is maintained even at 30 K. However, at 50 K, due to the substantial vaporization in the gas ice layer, the maximum charge capacity decreases, and only a small number of charge carriers are depleted at the C-2DEG interface. Consequently, the on/off ratio is significantly reduced. It is worth noting that the kink origin of all curves at VBG = 20 V is attributed to the voltage source switching of the Keithley 2400 source meter.

**3.** **Output characteristics at different temperatures**

**
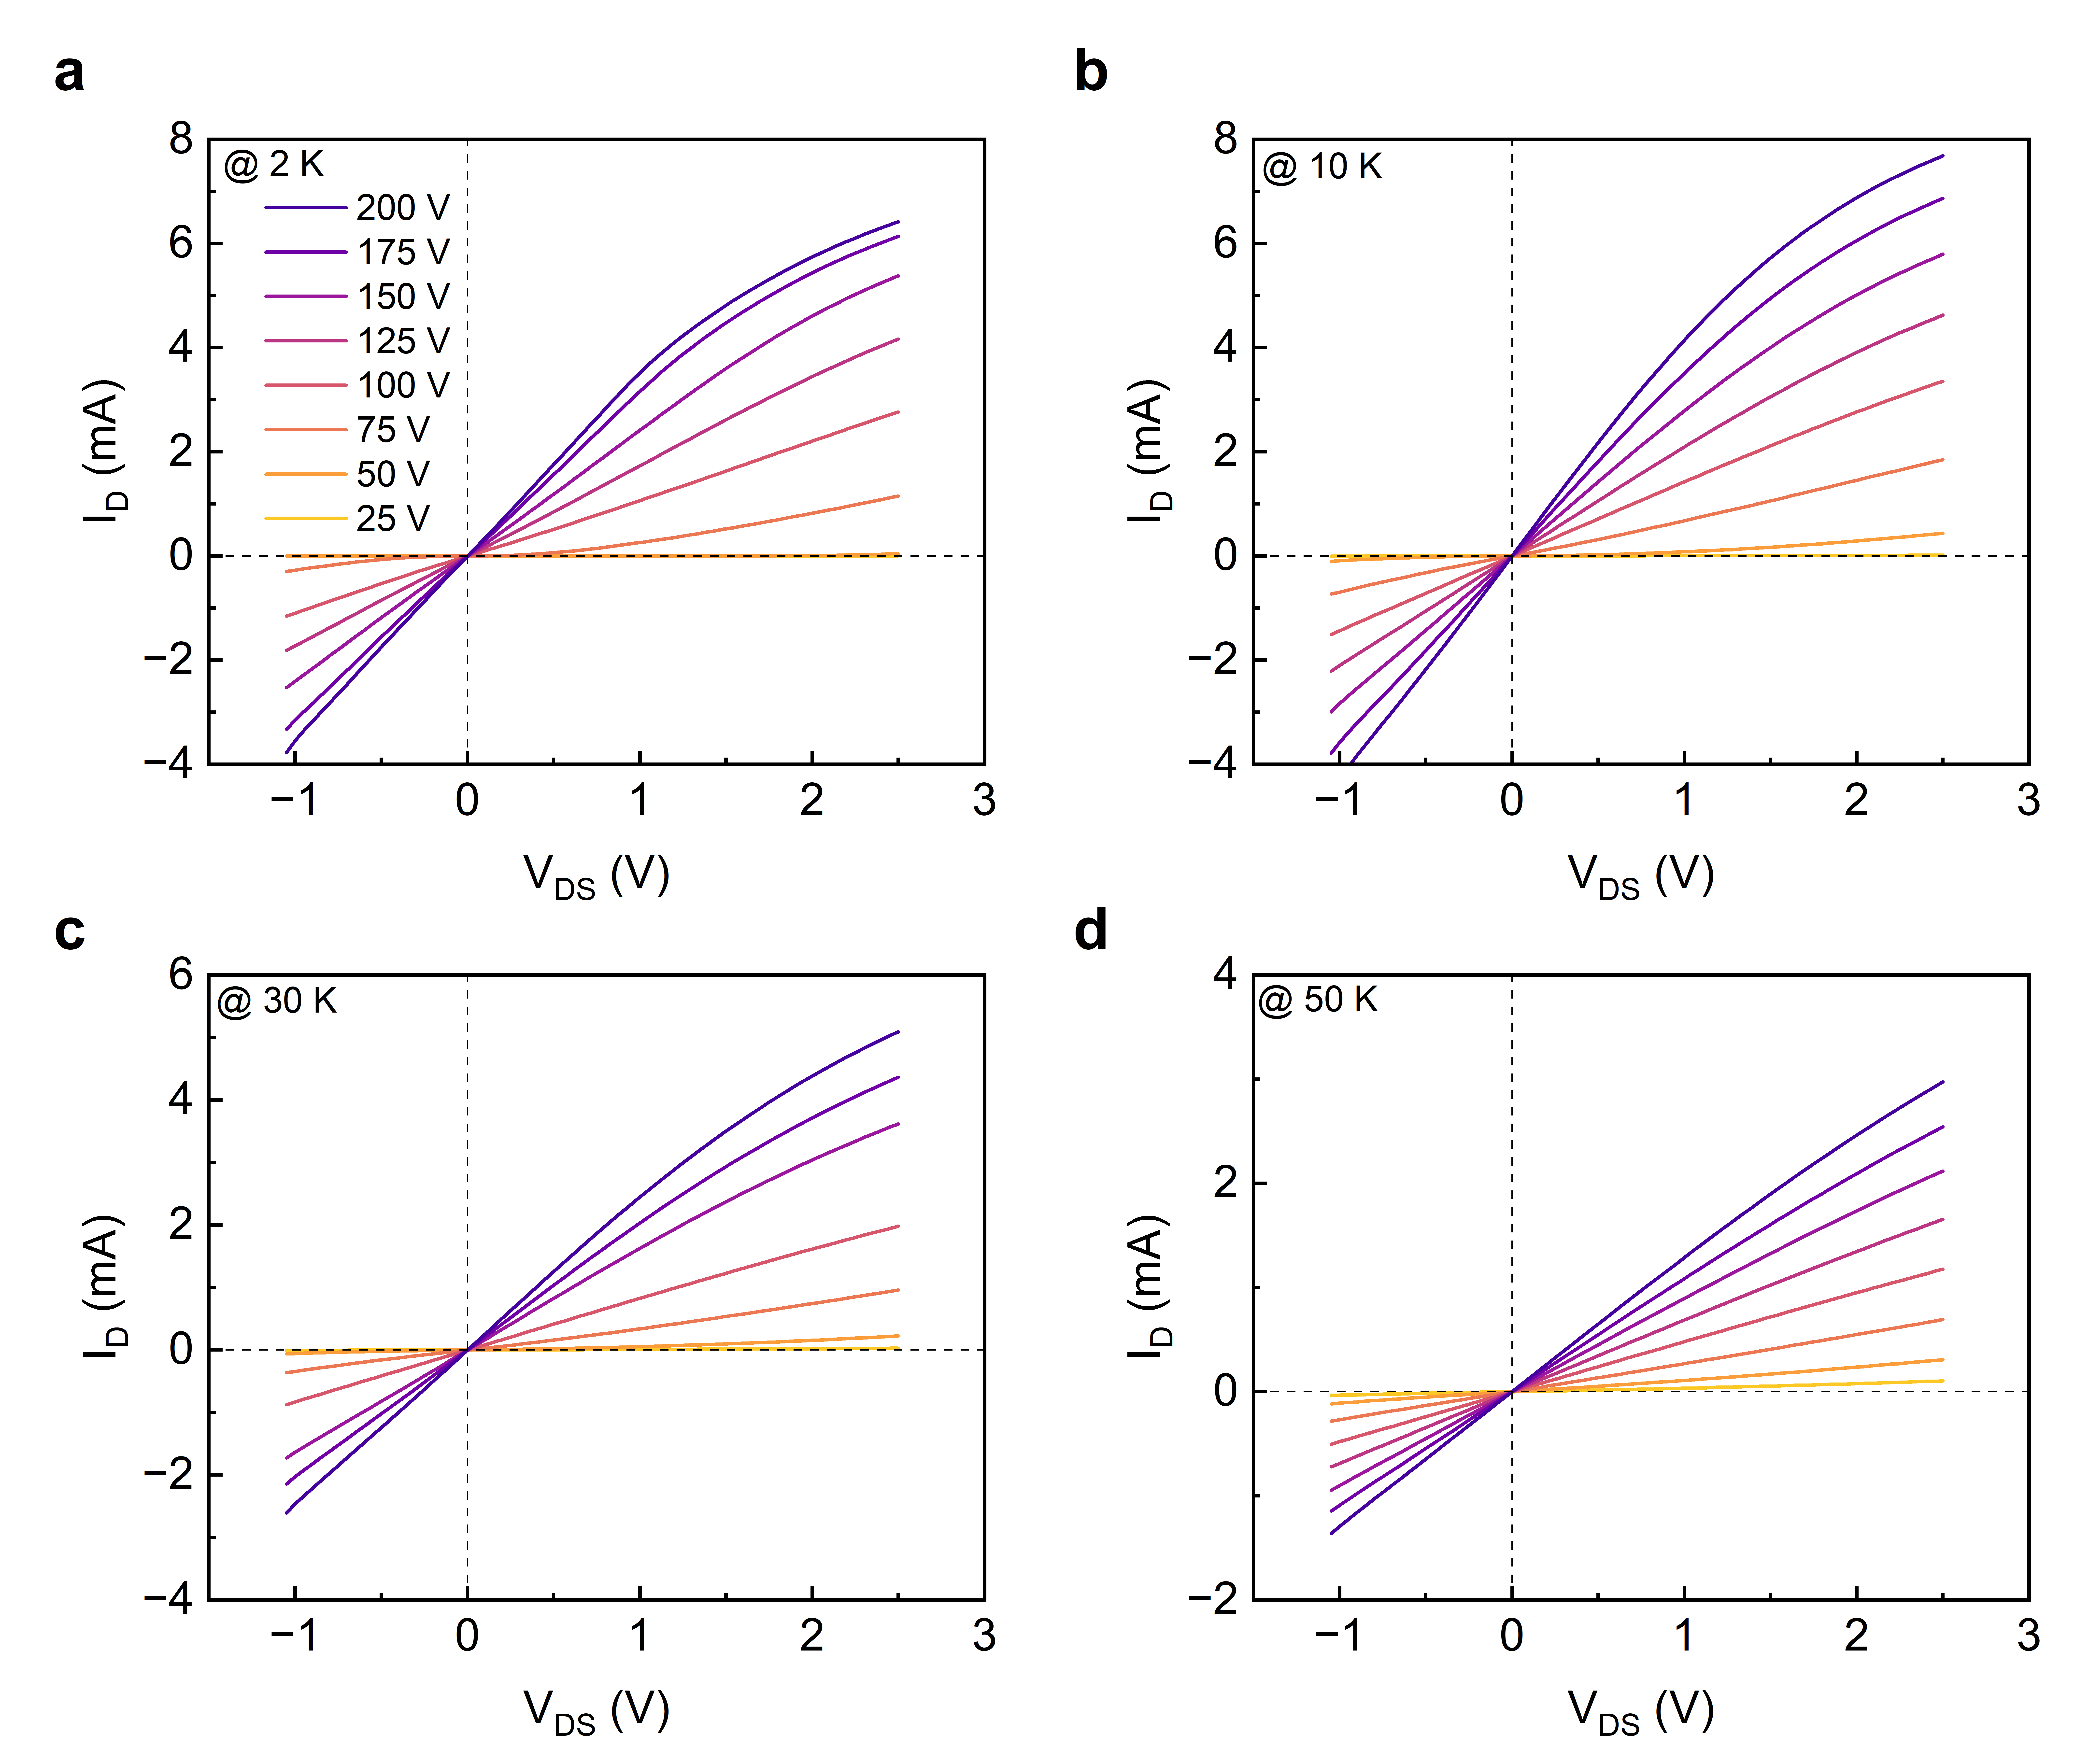
**

**Fig. S3 | VBG-dependent ID-VDS characteristics at different temperature.** Output characteristics (ID-VDS) of sample with STO substrate thickness of 0.5 mm under different VBG (from 200 V to 25 V) at 2 K (**a**), 10 K (**b**), 30 K (**c**) and 50 K (**d**).

At 2 K, linear ID-VDS characteristics emerge when VBG ≥ 75 V, indicating that the channel is fully turned on. With rising temperature, the minimum required VBG for the linear ID-VDS decreases, and eventually disappears at 50 K.

**4.** **Impact of STO substrate thickness**

**
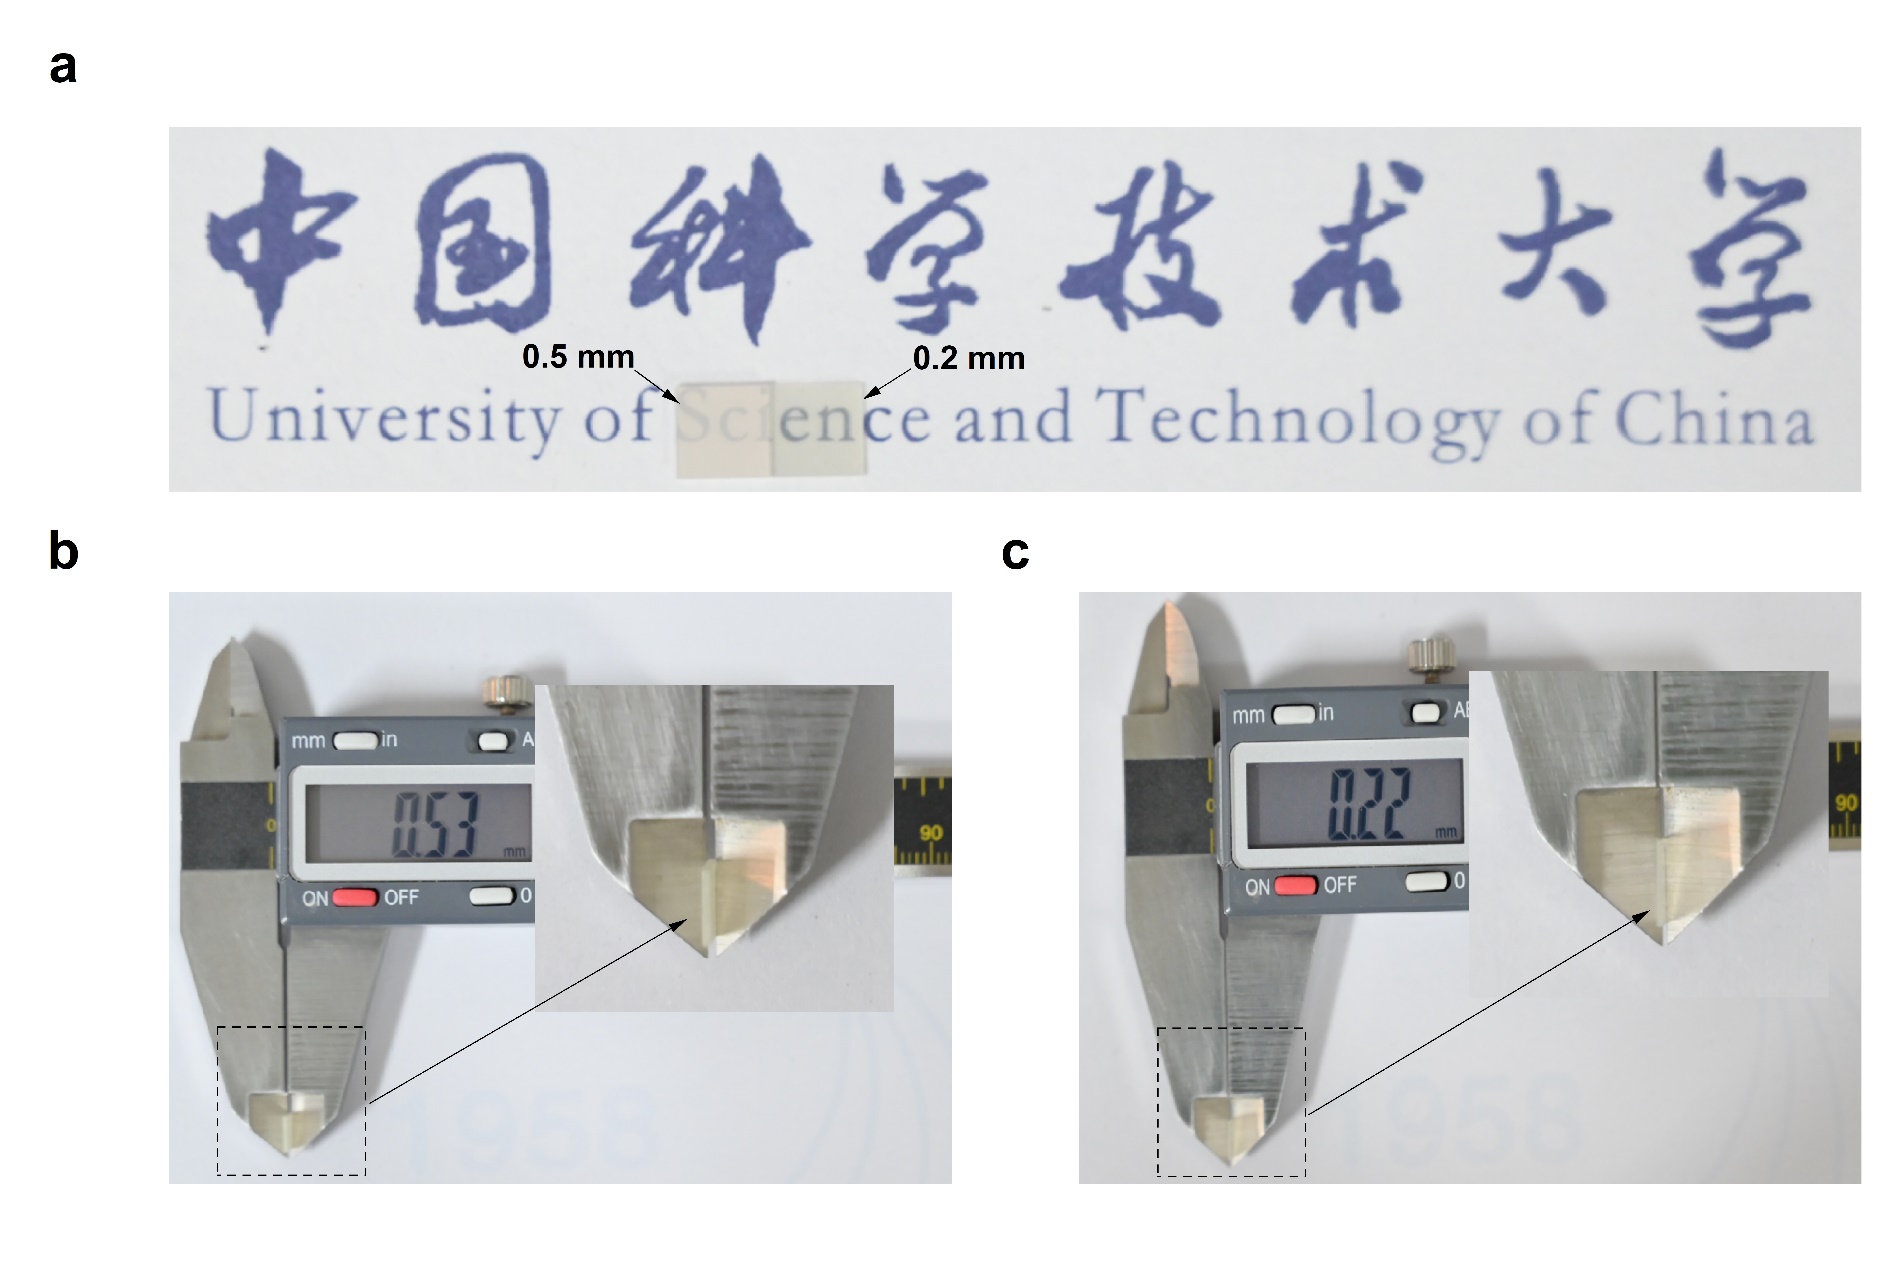
**

**Fig. S4 | Comparison of samples with substrates of different thickness. a,** Optical image comparison of substrates with different thicknesses. Thickness measured using a vernier caliper before (**b**) and after (**c**) thinning the STO substrate.

**5.** **Growth of LaFeO3 and LaAlO3 films**

**
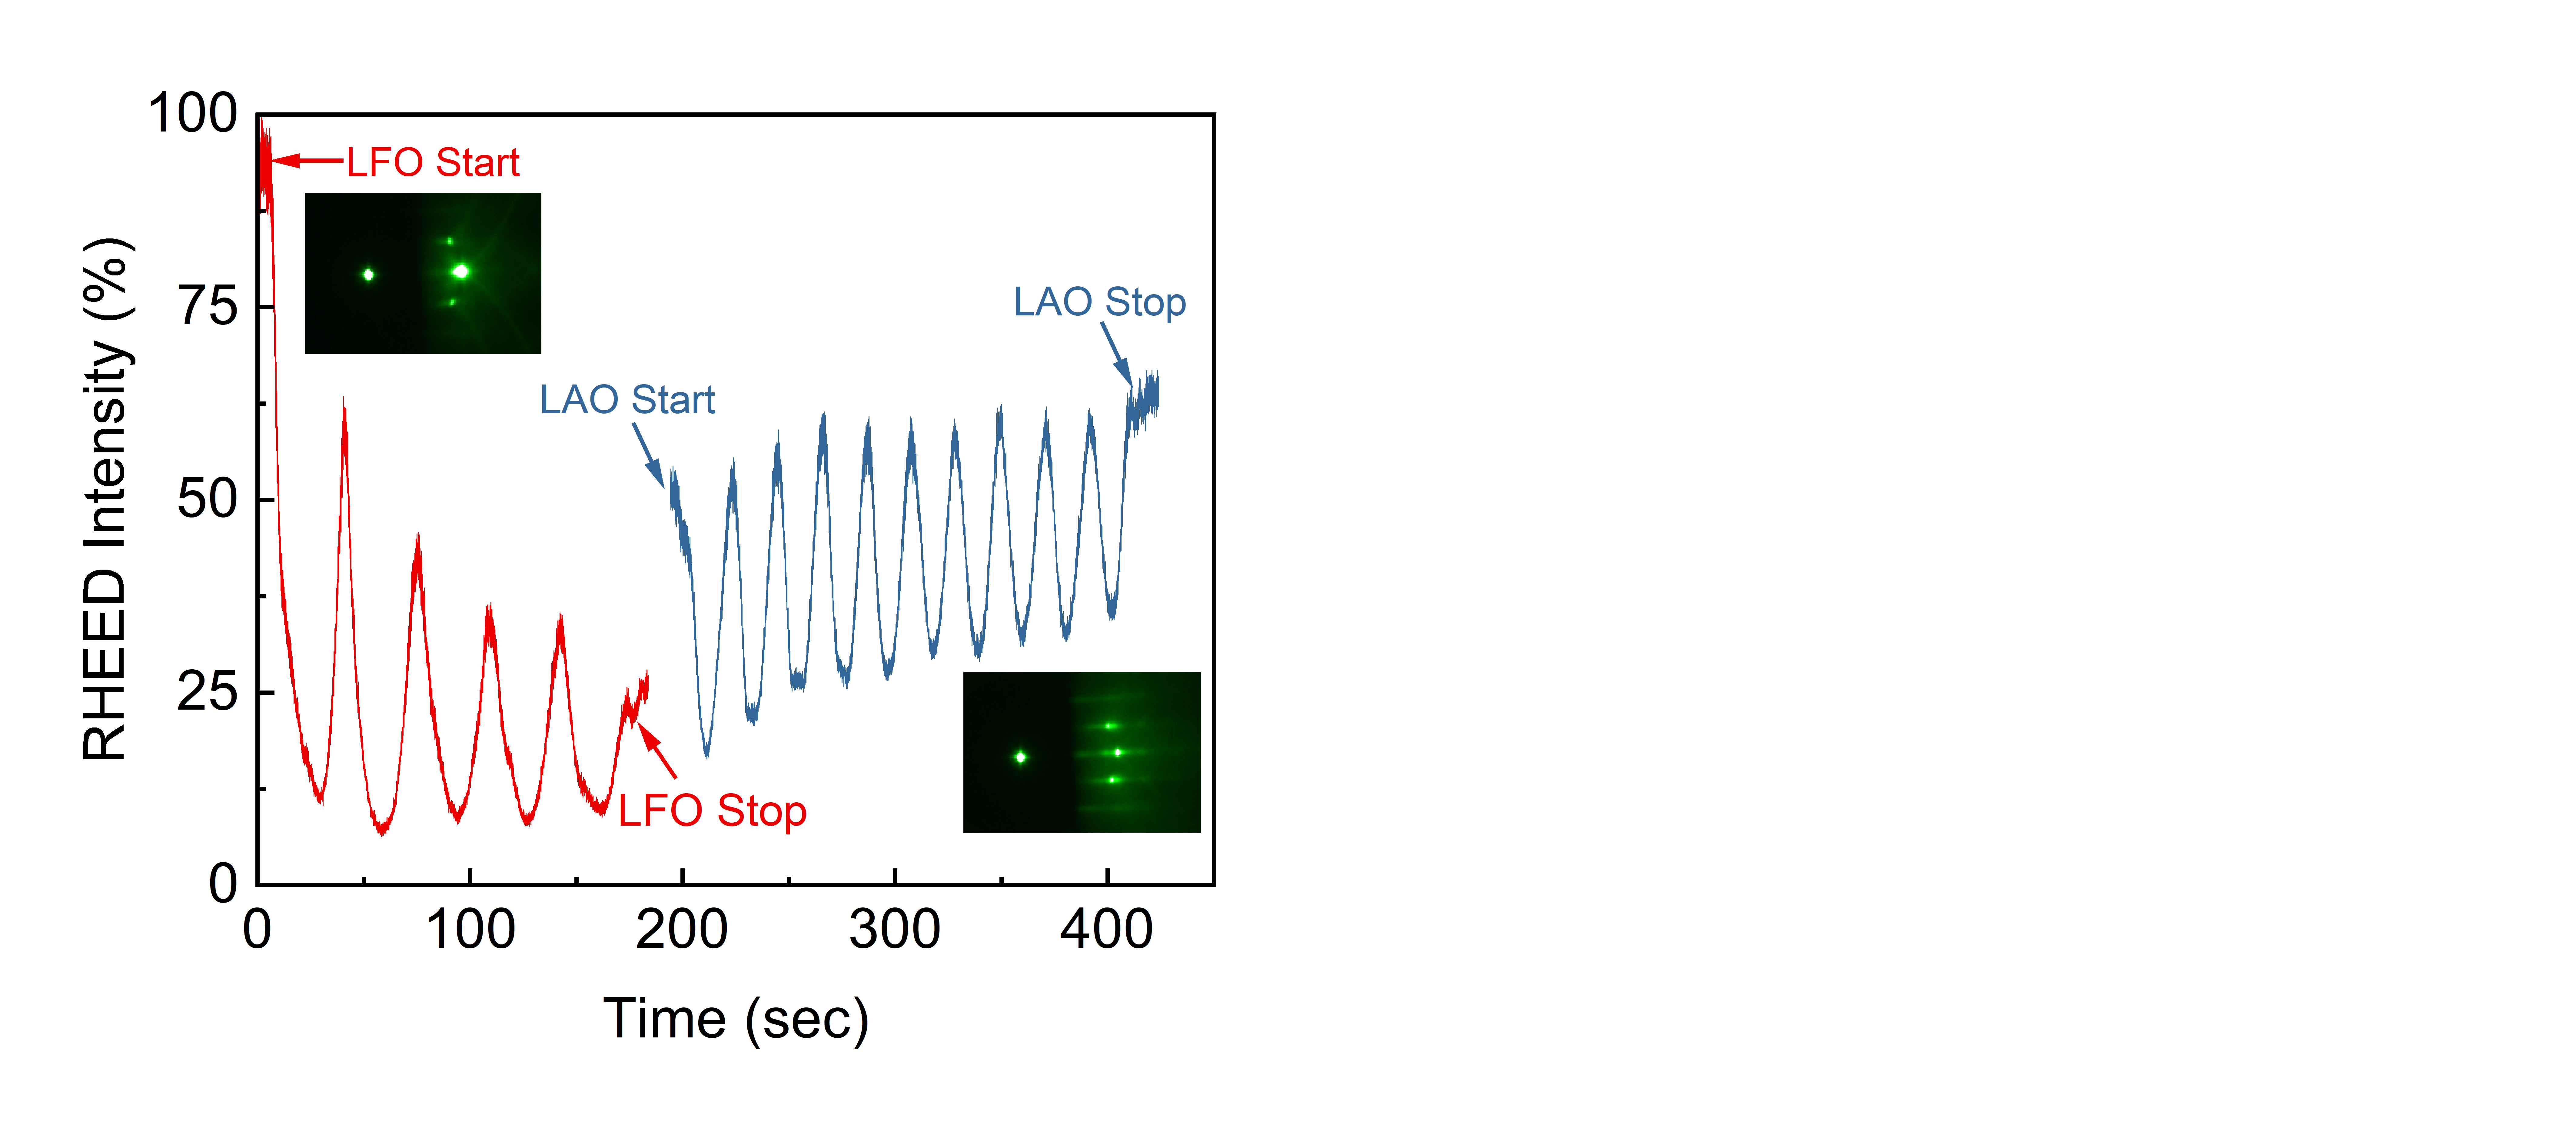
**

**Fig. S5 | RHEED characterization.** RHEED intensity oscillations during the growth of LFO (5 u.c., red line) and LAO (10 u.c., blue line). The upper left inset shows the RHEED pattern of the STO substrate before growth, and the lower right inset shows the RHEED pattern of the sample.

| **Pulsed back-gate voltage (V）** | **0** | **100** | **150** | **175** | **210** |
| --- | --- | --- | --- | --- | --- |
| **Charge density in gas ice layer (×1013 cm-2)** | 0 | 1.067 | 1.600 | 1.867 | 1.932 |
| **C-2DEG carrier concentration (×1013 cm-2)** | 1.932 | 0.865 | 0.332 | 0.065 | 0 |
| **Mobility (cm²V⁻¹s⁻¹)** | 2396 | 2396 | 2396 | 2396 | 2396 |
| **Calculate resistance (Ohm)** | - | 301.410 | 785.602 | 3992.142 | ∞ |
| **Real resistance**  **(Ohm)** | 135.815 | 301.464 | 761.964 | 3558.438 | 2.156×1010 |
| **Accuracy (RC/RR)** | - | 99.98 % | 103.10 % | 112.19 % | - |

**Table S1 |** Assuming constant mobility, the charge quantity of the gas ice layer, the interface carrier concentration, and the interface resistance are calculated after applying different pulsed VBG (ranging from 0 to 210 V). This is done through the analogy of parallel plate capacitors. The calculated resistance is then compared with the actual resistance (extracted from Fig. 1c in main text).

The calculated resistance demonstrates excellent accuracy at VBG = 100 V. As VBG increases and the electric field intensity rises, the relative dielectric constant of the single crystal STO decreases. Consequently, the actual charge amount in the gas ice layer becomes less than the calculated value, resulting in the calculated resistance being greater than the real resistance.

| **VBG (V）** | **0** | **30** | **50** | **75** | **150** | **210** |
| --- | --- | --- | --- | --- | --- | --- |
| **Injected carrier concentration (×1013 cm-2)** | 0 | 0.320 | 0.533 | 0.800 | 1.600 | 2.240 |
| **Real resistance**  **(Ohm)** | 2.156×1010 | 2950.310 | 2107.001 | 1589.054 | 621.538 | 344.618 |
| **Mobility (cm²V⁻¹s⁻¹)** | - | 662 | 557 | 492 | 628 | 810 |

**Table S2 | Carrier concentration and its mobility induced by different VBG (from 0 to 210 V) are calculated by the parallel plate capacitor model. Actual resistance is extracted from Fig. 2c in main text.** The carrier mobility induced by VBG is significantly lower than the initial mobility, but is still above 500 cm²V⁻¹s⁻¹.
